# Supplementary material
Source: PubMed Central journal article supplement (PMC5548445)
Supplement: ry161306suppa1.pdf [file ry161306suppa1.pdf]

**Table E1. Mortality Risks from All and Specific Causes in 41 486 Male FGI MDs (FGI) versus 46 846 Male Psychiatrists According to Time since Medical School Graduation, 1979–2008**

| Cause of Death                                      | <20 years          |                    | 20–29 years        |                   | 30–39 years        |                   | 40+ years          |                   | P Value |
|-----------------------------------------------------|--------------------|--------------------|--------------------|-------------------|--------------------|-------------------|--------------------|-------------------|---------|
|                                                     | Deaths (FGI/Psych) | RR*                | Deaths (FGI/Psych) | RR*               | Deaths (FGI/Psych) | RR                | Deaths (FGI/Psych) | RR*               |         |
| All causes of death                                 | 177/547            | 0.36 (0.31, 0.43)  | 308/763            | 0.62 (0.54, 0.71) | 622/1386           | 0.84 (0.76, 0.92) | 2313/4611          | 0.88 (0.84, 0.93) | <.001   |
| All malignant neoplasms                             | 66/91              | 0.91 (0.66, 1.26)  | 111/212            | 0.83 (0.65, 1.05) | 238/464            | 0.94 (0.80, 1.10) | 725/1387           | 0.92 (0.84, 1.00) | >.50    |
| Digestive organs                                    | 19/16              | 1.61 (0.81, 3.19)  | 33/69              | 0.73 (0.48, 1.12) | 66/152             | 0.77 (0.57, 1.03) | 196/382            | 0.89 (0.75, 1.06) | .20     |
| Stomach                                             | 1/1                | 1.48 (0.09, 23.7)  | 5/12               | 0.59 (0.2, 1.71)  | 8/16               | 0.83 (0.35, 1.96) | 19/31              | 1.03 (0.58, 1.83) | >.50    |
| Colon excluding rectum                              | 6/6                | 1.09 (0.34, 3.47)  | 10/20              | 0.70 (0.32, 1.52) | 17/51              | 0.65 (0.37, 1.13) | 61/125             | 0.85 (0.63, 1.16) | >.50    |
| Liver and intrahepatic bile duct                    | 1/3                | 0.59 (0.06, 5.74)  | 5/6                | 1.62 (0.48, 5.40) | 6/17               | 0.53 (0.21, 1.35) | 19/33              | 1.03 (0.58, 1.81) | .46     |
| Respiratory and intrathoracic organs                | 3/7                | 0.54 (0.13, 2.26)  | 19/39              | 0.98 (0.55, 1.72) | 57/92              | 1.15 (0.82, 1.60) | 149/288            | 0.91 (0.74, 1.11) | >.50    |
| Lung and bronchus                                   | 3/7                | 0.54 (0.13, 2.26)  | 19/39              | 0.98 (0.55, 1.72) | 54/89              | 1.13 (0.8, 1.59)  | 140/279            | 0.88 (0.72, 1.08) | >.50    |
| Skin                                                | 3/16               | 0.22 (0.065, 0.78) | 4/14               | 0.42 (0.13, 1.32) | 9/15               | 1.03 (0.45, 2.36) | 28/34              | 1.42 (0.86, 2.34) | .01     |
| Melanoma                                            | 3/7                | 0.49 (0.12, 1.96)  | 4/14               | 0.42 (0.13, 1.32) | 7/14               | 0.85 (0.34, 2.12) | 22/23              | 1.62 (0.90, 2.91) | .10     |
| Breast                                              | 0/1                | NA                 | 0/1                | NA                | 0/2                | NA                | 2/0                | NA                | .045    |
| Genitourinary organs                                | 3/5                | 0.82 (0.18, 3.73)  | 12/17              | 1.20 (0.55, 2.59) | 34/55              | 1.23 (0.80, 1.91) | 135/308            | 0.77 (0.63, 0.94) | .22     |
| Urinary bladder                                     | 0/1                | NA                 | 1/2                | 0.72 (0.06, 8.06) | 4/6                | 1.33 (0.36, 4.86) | 13/34              | 0.68 (0.36, 1.29) | >.50    |
| Brain and central nervous system (including benign) | 9/13               | 0.72 (0.30, 1.71)  | 7/19               | 0.47 (0.20, 1.14) | 18/31              | 0.99 (0.55, 1.78) | 21/60              | 0.60 (0.36, 0.98) | .49     |
| Brain and central nervous system malignancy         | 9/12               | 0.74 (0.31, 1.78)  | 7/18               | 0.49 (0.20, 1.20) | 18/29              | 1.08 (0.60, 1.97) | 20/53              | 0.64 (0.38, 1.08) | .45     |
| Total leukemia                                      | 4/5                | 0.97 (0.25, 3.77)  | 9/12               | 1.15 (0.47, 2.78) | 12/26              | 0.86 (0.43, 1.72) | 49/56              | 1.53 (1.04, 2.25) | >.50    |
| Leukemia excluding chronic lymphocytic leukemia     | 3/3                | 1.48 (0.28, 7.9)   | 6/7                | 1.24 (0.41, 3.76) | 7/12               | 1.00 (0.39, 2.55) | 19/28              | 1.17 (0.65, 2.1)  | >.50    |
| Total lymphoma                                      | 9/15               | 0.82 (0.35, 1.92)  | 15/18              | 1.29 (0.64, 2.6)  | 12/26              | 0.82 (0.41, 1.64) | 31/85              | 0.64 (0.42, 0.97) | .41     |
| Infectious diseases                                 | 18/119             | 0.15 (0.09, 0.24)  | 7/59               | 0.15 (0.07, 0.33) | 11/37              | 0.49 (0.25, 0.96) | 45/79              | 1.00 (0.70, 1.45) | <.001   |
| Septicemia                                          | 0/2                | NA                 | 1/1                | 2.03 (0.12, 34.5) | 5/9                | 0.92 (0.30, 2.80) | 23/35              | 1.19 (0.70, 2.01) | .34     |
| Diseases of blood-forming tissue                    | 1/2                | 0.41 (0.04, 4.58)  | 2/4                | 0.92 (0.16, 5.1)  | 5/5                | 2.08 (0.59, 7.3)  | 7/19               | 0.63 (0.26, 1.50) | .43     |
| All endocrine disorders                             | 0/18               | NA                 | 8/17               | 0.76 (0.32, 1.79) | 24/27              | 1.70 (0.97, 3.0)  | 64/145             | 0.78 (0.58, 1.05) | <.001   |
| Disorders of the thyroid gland                      | 0/0                | NA                 | 0/0                | NA                | 0/0                | NA                | 0/1                | NA                | NA      |
| Diabetes mellitus                                   | 0/5                | NA                 | 7/10               | 1.16 (0.43, 3.14) | 17/21              | 1.59 (0.82, 3.06) | 50/106             | 0.83 (0.60, 1.17) | .06     |

|                                                             |        |                    |        |                   |         |                   |          |                   |       |
|-------------------------------------------------------------|--------|--------------------|--------|-------------------|---------|-------------------|----------|-------------------|-------|
| Neurologic and mental conditions                            | 2/7    | 0.32 (0.06, 1.60)  | 5/18   | 0.33 (0.12, 0.92) | 17/37   | 0.87 (0.48, 1.55) | 125/218  | 1.03 (0.83, 1.29) | .06   |
| All circulatory diseases                                    | 29/77  | 0.51 (0.33, 0.80)  | 79/217 | 0.65 (0.50, 0.85) | 234/511 | 0.88 (0.76, 1.04) | 957/1837 | 0.91 (0.84, 0.99) | .007  |
| Ischemic heart disease                                      | 13/38  | 0.49 (0.25, 0.93)  | 58/153 | 0.68 (0.50, 0.93) | 154/338 | 0.87 (0.72, 1.06) | 581/1077 | 0.94 (0.85, 1.04) | .05   |
| Cerebrovascular diseases                                    | 2/8    | 0.31 (0.06, 1.54)  | 8/17   | 1.00 (0.41, 2.38) | 26/49   | 1.04 (0.64, 1.70) | 134/263  | 0.91 (0.74, 1.12) | >.50  |
| All diseases of the respiratory system                      | 3/7    | 0.46 (0.12, 1.79)  | 6/19   | 0.55 (0.21, 1.40) | 20/63   | 0.70 (0.42, 1.16) | 153/339  | 0.80 (0.66, 0.97) | >.50  |
| Pneumonia and influenza                                     | 1/5    | 0.22 (0.02, 1.91)  | 1/10   | 0.17 (0.02, 1.38) | 4/17    | 0.5 (0.17, 1.52)  | 50/105   | 0.84 (0.60, 1.18) | .15   |
| Chronic obstructive pulmonary disease and allied conditions | 1/1    | 0.92 (0.06, 14.72) | 3/4    | 1.39 (0.29, 6.58) | 12/26   | 1.1 (0.55, 2.19)  | 58/142   | 0.72 (0.53, 0.98) | >.50  |
| All gastrointestinal diseases                               | 0/19   | NA                 | 13/23  | 0.87 (0.43, 1.73) | 19/43   | 0.85 (0.49, 1.48) | 60/127   | 0.82 (0.61, 1.12) | <.001 |
| Chronic liver disease and cirrhosis                         | 0/5    | NA                 | 7/14   | 0.71 (0.28, 1.79) | 7/19    | 0.65 (0.27, 1.57) | 22/40    | 0.94 (0.56, 1.58) | .19   |
| All genitourinary diseases                                  | 1/2    | 0.71 (0.05, 9.32)  | 2/3    | 0.78 (0.13, 4.83) | 5/6     | 1.91 (0.56, 6.45) | 38/88    | 0.77 (0.53, 1.13) | >.50  |
| Accidents and adverse effects                               | 50/157 | 0.35 (0.25, 0.48)  | 50/132 | 0.53 (0.38, 0.74) | 37/130  | 0.51 (0.35, 0.73) | 78/181   | 0.75 (0.58, 0.98) | .004  |
| Suicide and self-inflicted injury                           | 18/109 | 0.19 (0.11, 0.31)  | 25/80  | 0.44 (0.28, 0.70) | 13/97   | 0.22 (0.13, 0.40) | 23/76    | 0.52 (0.32, 0.83) | .007  |
| Homicide and legal intervention                             | 2/12   | 0.16 (0.03, 0.72)  | 4/9    | 0.56 (0.17, 1.87) | 3/8     | 0.65 (0.17, 2.47) | 2/5      | 0.68 (0.13, 3.51) | .42   |

Note.—Data in parentheses are 95% CIs. FGI/Psych = FGI MD/Psychiatrist, NA = not applicable.

\* Stratified by year of attained age (30–34, 35–39, 40–44, 45–49, 50–54, 55–59, 60–64, 65–69, 70–74, 75–79, and ≥80 years) and year of birth (1910–1919, 1920–1929, 1930–1939, 1940–1949, 1950–1959, 1960–1969, and 1970–1982).

**Table E2. Mortality Risks from All and Specific Causes in 4148 Female FGI MDs versus 17 555 Female Psychiatrists, 1979–2008**

| Cause of Death                                      | <1940                |                   | 1940–1959            |                    | 1960–1979            |                   | ≥1980                |                   | P Value | Overall              |                   |
|-----------------------------------------------------|----------------------|-------------------|----------------------|--------------------|----------------------|-------------------|----------------------|-------------------|---------|----------------------|-------------------|
|                                                     | Deaths (FGI/Psych h) | RR*               | Deaths (FGI/Psych h) | RR*                | Deaths (FGI/Psych h) | RR*               | Deaths (FGI/Psych h) | RR*               |         | Deaths (FGI/Psych h) | RR*               |
| All causes of death                                 | 3/22                 | 0.47 (0.14, 1.57) | 41/179               | 1.04 (0.74, 1.46)  | 25/179               | 0.73 (0.48, 1.11) | 17/127               | 0.59 (0.35, 0.98) | .20     | 86/507               | 0.80 (0.63, 1.00) |
| All malignant neoplasms                             | 0/7                  | NA                | 18/71                | 1.18 (0.7, 1.98)   | 13/88                | 0.77 (0.43, 1.39) | 6/51                 | 0.56 (0.24, 1.31) | .13     | 37/217               | 0.83 (0.58, 1.18) |
| Breast                                              | 0/0                  | NA                | 2/2                  | 1.87 (0.26, 13.33) | 0/2                  | NA                | 0/0                  | NA                | .11     | 2/4                  | 0.83 (0.15, 4.56) |
| Brain and central nervous system (including benign) | 0/0                  | NA                | 0/2                  | NA                 | 0/5                  | NA                | 0/4                  | NA                | >.50    | 0/11                 | NA                |
| Brain and central nervous system malignancy         | 0/0                  | NA                | 0/2                  | NA                 | 0/5                  | NA                | 0/4                  | NA                | >.50    | 0/11                 | NA                |
| Total leukemia                                      | 0/0                  | NA                | 0/5                  | NA                 | 0/4                  | NA                | 0/3                  | NA                | >.50    | 0/12                 | NA                |
| Leukemia excluding CLL                              | 0/0                  | NA                | 0/4                  | NA                 | 0/2                  | NA                | 0/2                  | NA                | >.50    | 0/8                  | NA                |

|                                                     |     |                  |      |                   |      |                   |      |                    |      |        |                   |
|-----------------------------------------------------|-----|------------------|------|-------------------|------|-------------------|------|--------------------|------|--------|-------------------|
| Acute myeloid leukemia and myelodysplastic syndrome | 0/0 | NA               | 0/3  | NA                | 0/0  | NA                | 0/2  | NA                 | >.50 | 0/5    | NA                |
| All circulatory diseases                            | 2/6 | 1.12 (0.22, 5.5) | 8/52 | 0.66 (0.32, 1.40) | 1/32 | 0.16 (0.02, 1.18) | 2/11 | 0.92 (0.2, 4.2)    | .33  | 13/101 | 0.58 (0.32, 1.03) |
| Ischemic heart disease                              | 0/4 | NA               | 5/22 | 1.00 (0.38, 2.64) | 0/14 | NA                | 1/5  | 1.18 (0.14, 10.15) | .13  | 6/45   | 0.62 (0.26, 1.46) |
| Cerebrovascular diseases                            | 1/0 | NA               | 2/14 | 0.59 (0.13, 2.61) | 0/8  | NA                | 0/1  | NA                 | .12  | 3/23   | 0.56 (0.17, 1.86) |

Note.—Data in parentheses are 95% CIs. FGI/Psych = FGI MD/Psychiatrist, NA = not applicable.

\* Stratified by year of attained age (30–34, 35–39, 40–44, 45–49, 50–54, 55–59, 60–64, 65–69, 70–74, 75–79, and ≥80 years), year of birth (1910–1919, 1920–1929, 1930–1939, 1940–1949, 1950–1959, 1960–1969, and 1970–1982), and year of medical school graduation (<1940, 1940–1959, 1960–1979, and ≥1980).

**Table E3. Mortality Risks from All and Specific Causes in Male FGI MDs versus Male Psychiatrists Who Were Confirmed Alive or Deceased According to Year of Medical School Graduation, 1979–2008**

| Cause of Death                                      | <1940                |                   | 1940–1959            |                   | 1960–1979            |                   | ≥1980                |                   | P Value | Overall              |                   |
|-----------------------------------------------------|----------------------|-------------------|----------------------|-------------------|----------------------|-------------------|----------------------|-------------------|---------|----------------------|-------------------|
|                                                     | Deaths (FGI/Psych h) | RR*               |         | Deaths (FGI/Psych h) | RR*               |
| All causes of death                                 | 376/624              | 0.89 (0.78, 1.01) | 2183/4549            | 0.87 (0.83, 0.91) | 712/1803             | 0.60 (0.54, 0.65) | 149/331              | 0.40 (0.33, 0.49) | <.001   | 3420/7307            | 0.77 (0.74, 0.80) |
| All malignant neoplasms                             | 98/153               | 0.95 (0.74, 1.23) | 713/1381             | 0.94 (0.85, 1.02) | 273/562              | 0.75 (0.65, 0.87) | 56/58                | 0.97 (0.66, 1.42) | .08     | 1140/2154            | 0.89 (0.83, 0.96) |
| Brain and central nervous system (including benign) | 2/9                  | 0.33 (0.07, 1.53) | 25/61                | 0.74 (0.46, 1.18) | 19/41                | 0.62 (0.36, 1.08) | 9/12                 | 0.70 (0.29, 1.71) | >.50    | 55/123               | 0.66 (0.48, 0.92) |
| Brain and central nervous system malignancy         | 1/8                  | 0.19 (0.02, 1.5)  | 25/56                | 0.8 (0.5, 1.3)    | 19/37                | 0.7 (0.4, 1.23)   | 9/11                 | 0.73 (0.3, 1.8)   | .48     | 54/112               | 0.71 (0.51, 1.00) |
| Total leukemia                                      | 10/4                 | 3.7 (1.16, 11.8)  | 43/59                | 1.32 (0.9, 1.96)  | 19/34                | 0.88 (0.49, 1.55) | 2/2                  | 0.90 (0.12, 6.63) | .14     | 74/99                | 1.26 (0.93, 1.7)  |
| Leukemia excluding CLL                              | 4/1                  | 5.91 (0.66, 52.8) | 17/32                | 0.95 (0.53, 1.71) | 12/16                | 1.08 (0.51, 2.31) | 2/1                  | 1.47 (0.13, 16.2) | .36     | 35/50                | 1.12 (0.72, 1.72) |
| Acute myeloid leukemia and myelodysplastic syndrome | 2/1                  | 2.96 (0.27, 32.7) | 19/30                | 1.14 (0.64, 2.03) | 11/10                | 1.60 (0.67, 3.81) | 0/0                  | NA                | >.50    | 32/41                | 1.31 (0.82, 2.09) |
| All circulatory diseases                            | 197/312              | 0.94 (0.78, 1.12) | 874/1791             | 0.89 (0.82, 0.96) | 204/484              | 0.70 (0.59, 0.82) | 24/55                | 0.42 (0.26, 0.69) | .001    | 1299/2642            | 0.84 (0.79, 0.90) |
| Ischemic heart disease                              | 119/201              | 0.88 (0.7, 1.1)   | 540/1084             | 0.90 (0.81, 1.00) | 135/291              | 0.76 (0.62, 0.94) | 12/30                | 0.41 (0.2, 0.81)  | .07     | 806/1606             | 0.86 (0.80, 0.94) |
| Cerebrovascular diseases                            | 28/38                | 1.09 (0.67, 1.77) | 118/229              | 0.93 (0.75, 1.16) | 23/64                | 0.66 (0.41, 1.07) | 1/6                  | 0.13 (0.01, 1.06) | .07     | 170/337              | 0.88 (0.73, 1.06) |

Note.—Data in parentheses are 95% CIs. CLL = chronic lymphocytic leukemia, FGI/Psych = FGI MD/Psychiatrist, NA = not applicable.

\* Stratified by year of attained age (30–34, 35–39, 40–44, 45–49, 50–54, 55–59, 60–64, 65–69, 70–74, 75–79, and ≥80 years), year of birth (1910–1919, 1920–1929, 1930–1939, 1940–1949, 1950–1959, 1960–1969, and 1970–1982), and year of medical school graduation (<1940, 1940–1959, 1960–1979, and ≥1980).

**Table E4. Standardized Mortality Ratios and 95% Confidence Intervals for All and Specific Causes of Death in 45 634 FGI MDs and in 64 401 Psychiatrists versus the General U.S. Population, 1979–2008**

| Cause of death                                       | FGI MDs vs General Population |                   | Psychiatrists vs General Population |                   |
|------------------------------------------------------|-------------------------------|-------------------|-------------------------------------|-------------------|
|                                                      | No. Observed                  | SMR*              | No. Observed                        | SMR*              |
| All causes                                           | 3506                          | 0.38 (0.37, 0.40) | 7814                                | 0.50 (0.49, 0.52) |
| All malignant neoplasms                              | 1177                          | 0.47 (0.45, 0.50) | 2371                                | 0.54 (0.51, 0.56) |
| Malignant and benign neoplasms of brain and CNS      | 55                            | 0.73 (0.55, 0.95) | 134                                 | 1.09 (0.91, 1.29) |
| Malignant brain/CNS                                  | 54                            | 0.80 (0.6, 1.05)  | 123                                 | 1.12 (0.93, 1.34) |
| Total leukemia                                       | 74                            | 0.80 (0.63, 1.01) | 111                                 | 0.70 (0.57, 0.84) |
| Leukemia excluding chronic lymphocytic leukemia      | 35                            | 0.64 (0.44, 0.89) | 58                                  | 0.62 (0.47, 0.80) |
| CLL                                                  |                               |                   |                                     |                   |
| Acute myeloid leukemia plus myelodysplastic syndrome | 32                            | 0.65 (0.44, 0.92) | 46                                  | 0.53 (0.39, 0.71) |
| All circulatory diseases                             | 1312                          | 0.39 (0.37, 0.41) | 2743                                | 0.47 (0.45, 0.48) |
| Ischemic heart disease                               | 812                           | 0.41 (0.38, 0.44) | 1651                                | 0.48 (0.45, 0.50) |
| Cerebrovascular disease                              | 173                           | 0.42 (0.36, 0.49) | 360                                 | 0.48 (0.43, 0.53) |

Note.—Data in parentheses are 95% CIs. SMR = standardized mortality ratio.

\* Stratified by year of attained age (30–34, 35–39, 40–44, 45–49, 50–54, 55–59, 60–64, 65–69, 70–74, 75–79, and ≥80 years), year of birth (1910–1919, 1920–1929, 1930–1939, 1940–1949, 1950–1959, 1960–1969, and 1970–1982), and year of medical school graduation (<1940, 1940–1959, 1960–1979, and ≥1980).
